# Supplementary material for: Surface-enhanced Raman spectroscopy for the characterization of bacterial pellets of Staphylococcus aureus infected by bacteriophage
Source: Royal Society of Chemistry journal article supplement (doi:10.1039/d3ra07575c), 2024-01-01
Supplement: d3ra07575c1.pdf [file d3ra07575c1.pdf]

## Surface-enhanced Raman spectroscopy for the characterization of bacterial pellets of *Staphylococcus Aureus* infected by bacteriophage

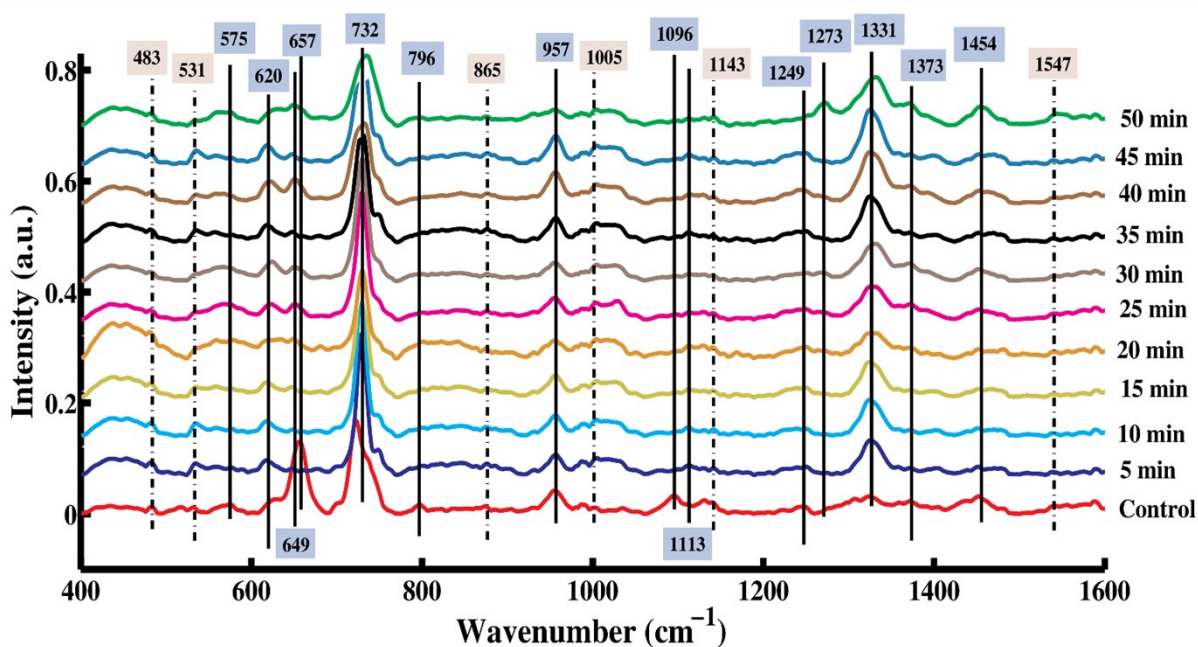

**Fig. S1** Mean SERS spectra of control and phage exposed *S. aureus* bacterial samples including 5-50 minutes of exposure with the interval of 5 minutes each.

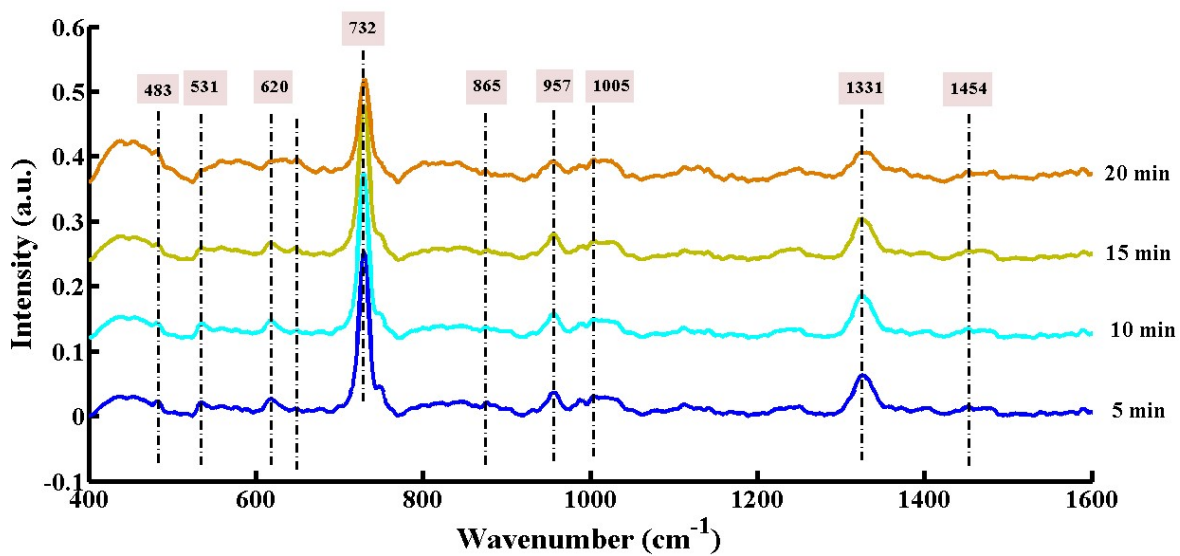

**Fig. S2** Mean SERS spectra of 5, 10, 15 and 20 minutes of phage exposed *S. aureus* bacterial samples.

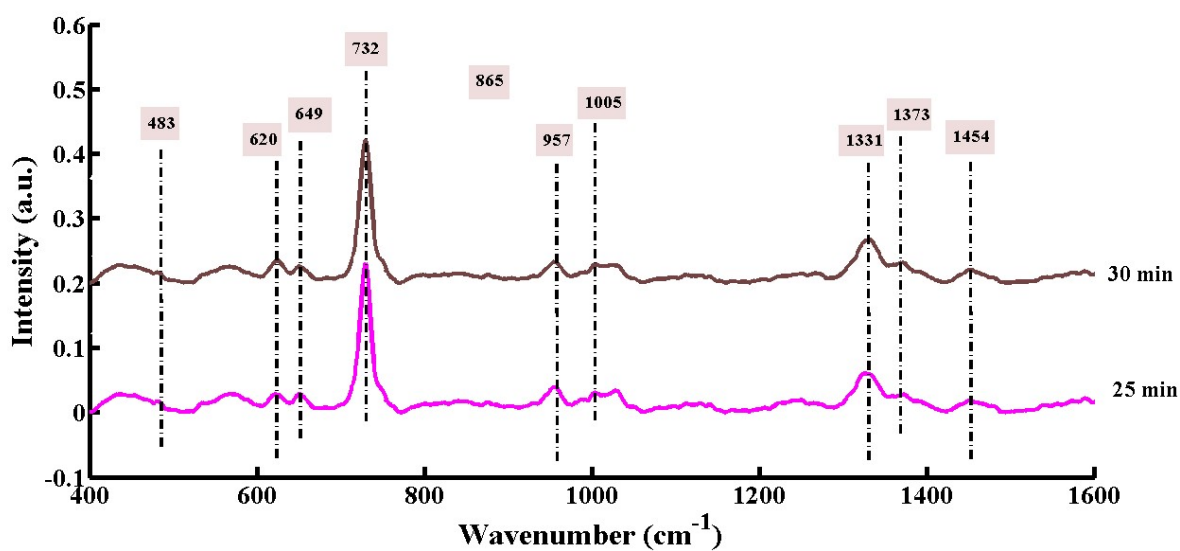

**Fig. S3** Mean SERS spectra of 25 and 30 minutes of phage exposed *S. aureus* bacterial samples.

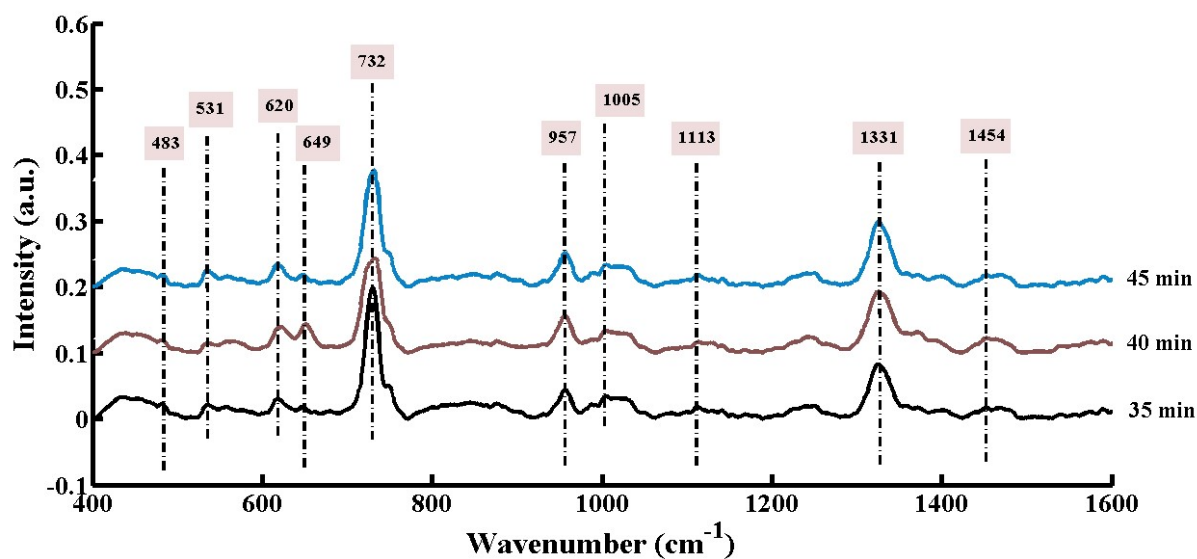

Fig. S4 Mean SERS spectra of 35, 40 and 45 minutes of phage exposed *S. aureus* bacterial samples.

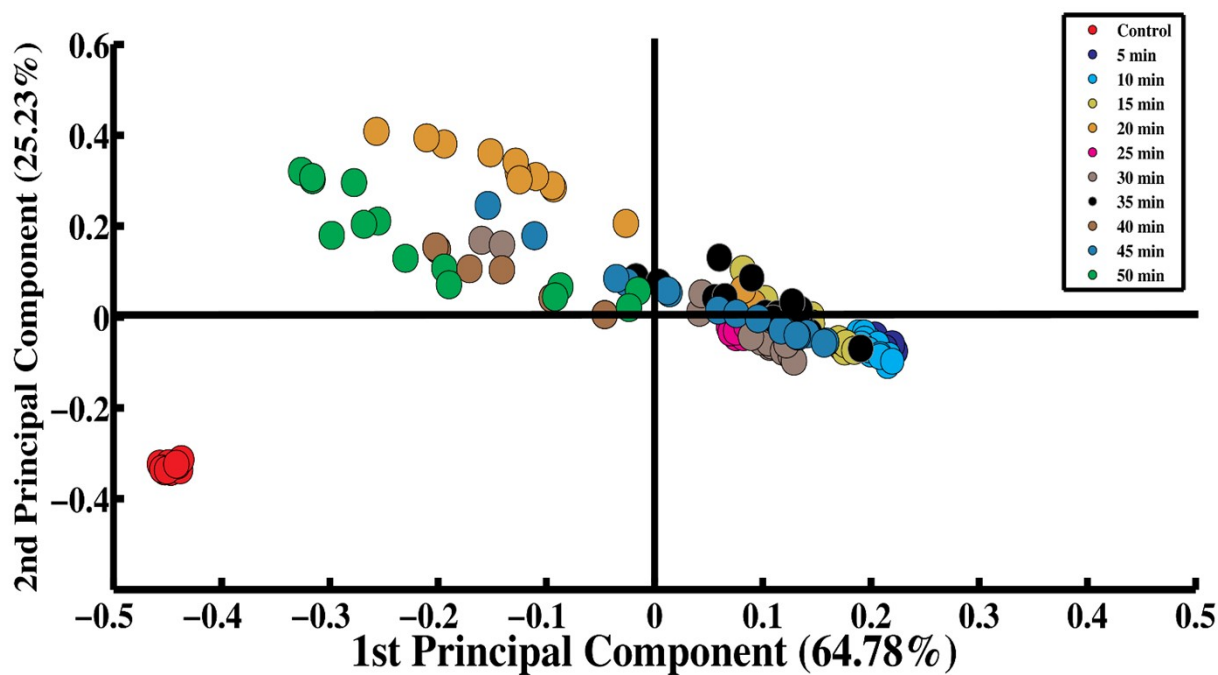

Fig. S5: PCA Scatter plot of SERS spectra of control and phage exposed *S. aureus* bacterial samples including 5- 50 minutes with 5 minutes of exposure each.

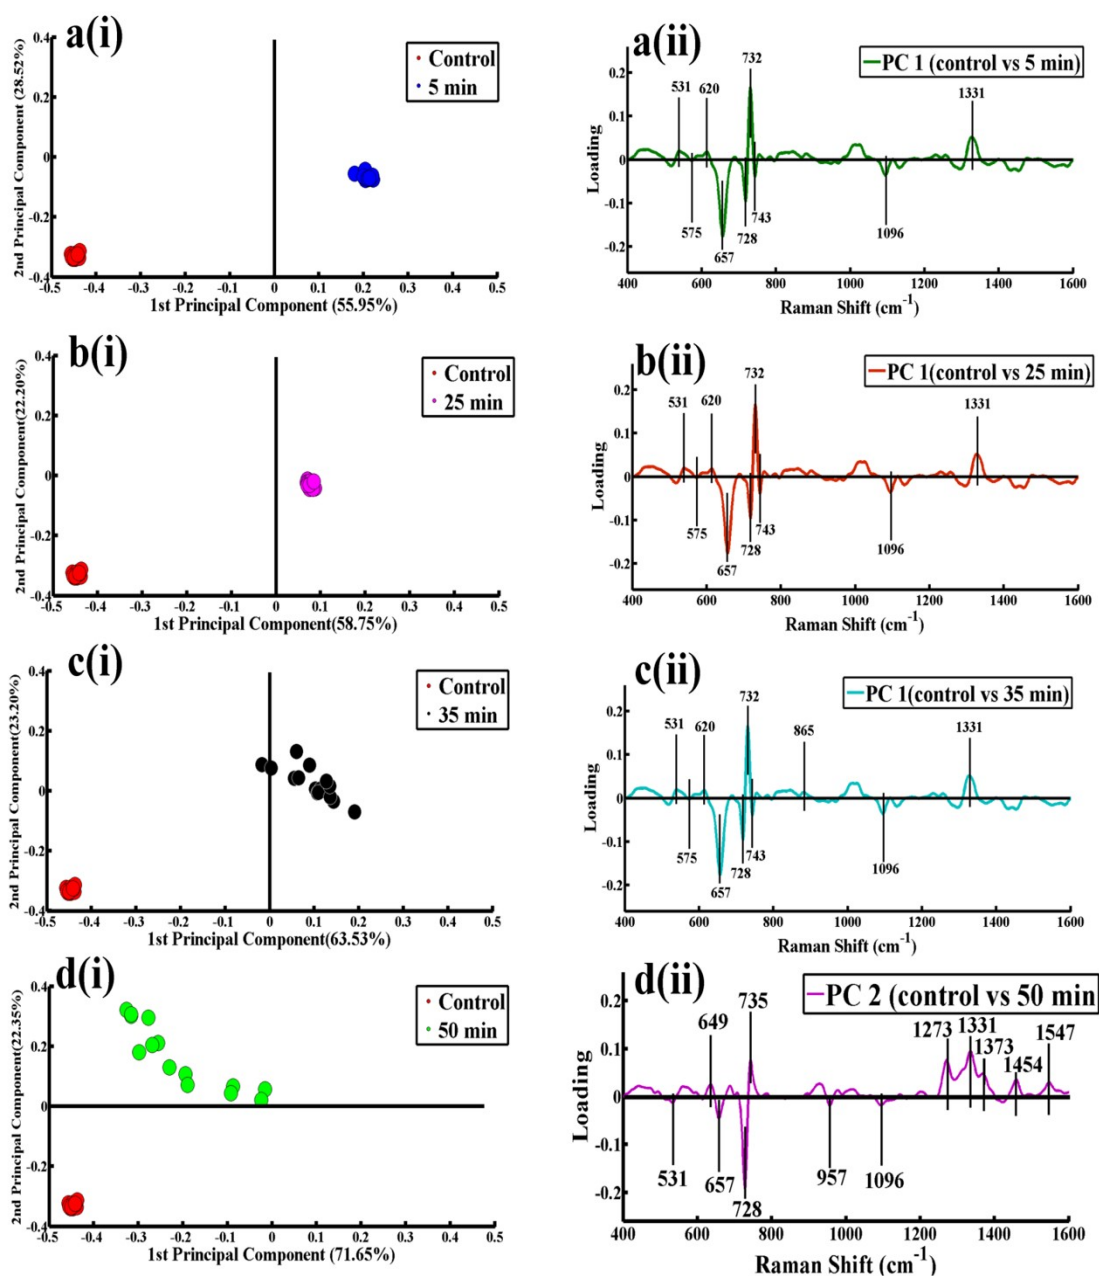

**Fig. S6:** PCA scatter plots and loadings of the SERS spectral data sets **a(i)** Scatter plot of the control and 5 minutes of intervals. **a(ii)** Loading between control and 5 minutes of intervals. **b(i)** Scatter plot of the control and 25 minutes of intervals. **b(ii)** Loading between control and 25 minutes of intervals. **c(i)** Scatter plot of the control and 35 minutes of intervals. **c(ii)** Loading between control and 35 minutes of intervals. **d(i)** Scatter plot of the control and 55 minutes of interval. **d(ii)** Loading between the control and 50 minutes of interval.

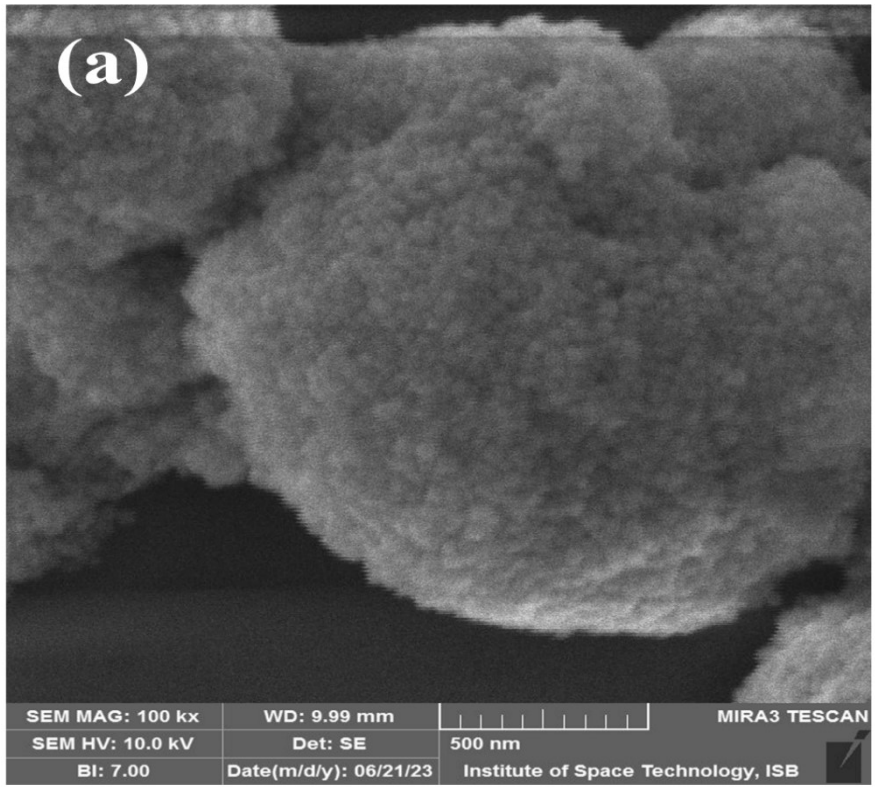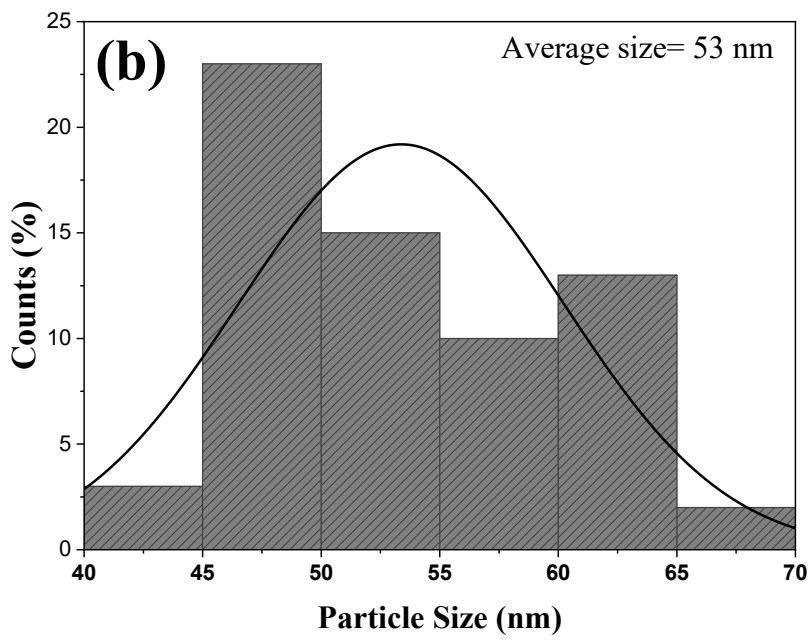

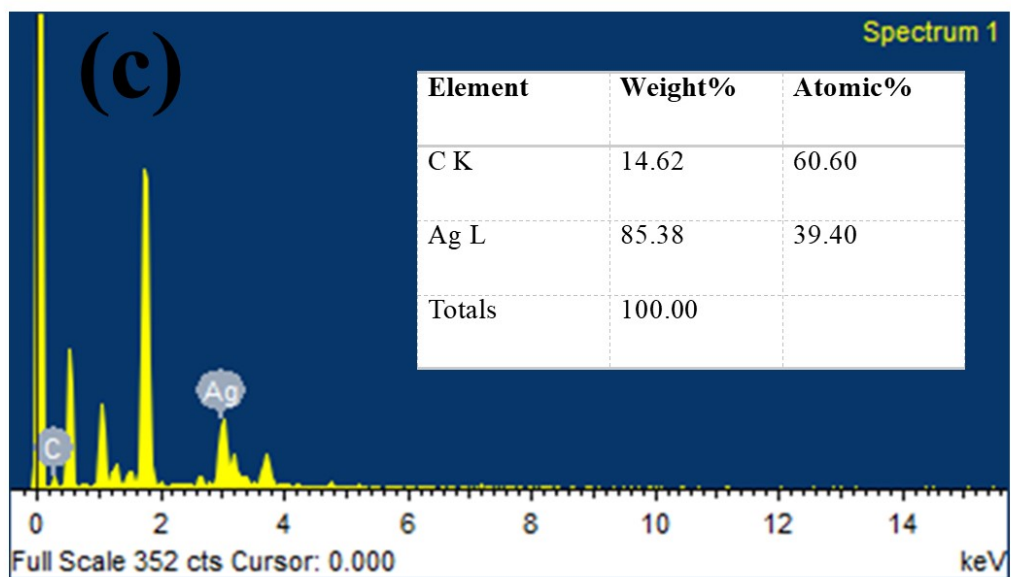

**Fig. S7:** SEM image of AgNPs (a), Histogram of AgNPs size (b) and elemental analysis of AgNPs through EDX (c).

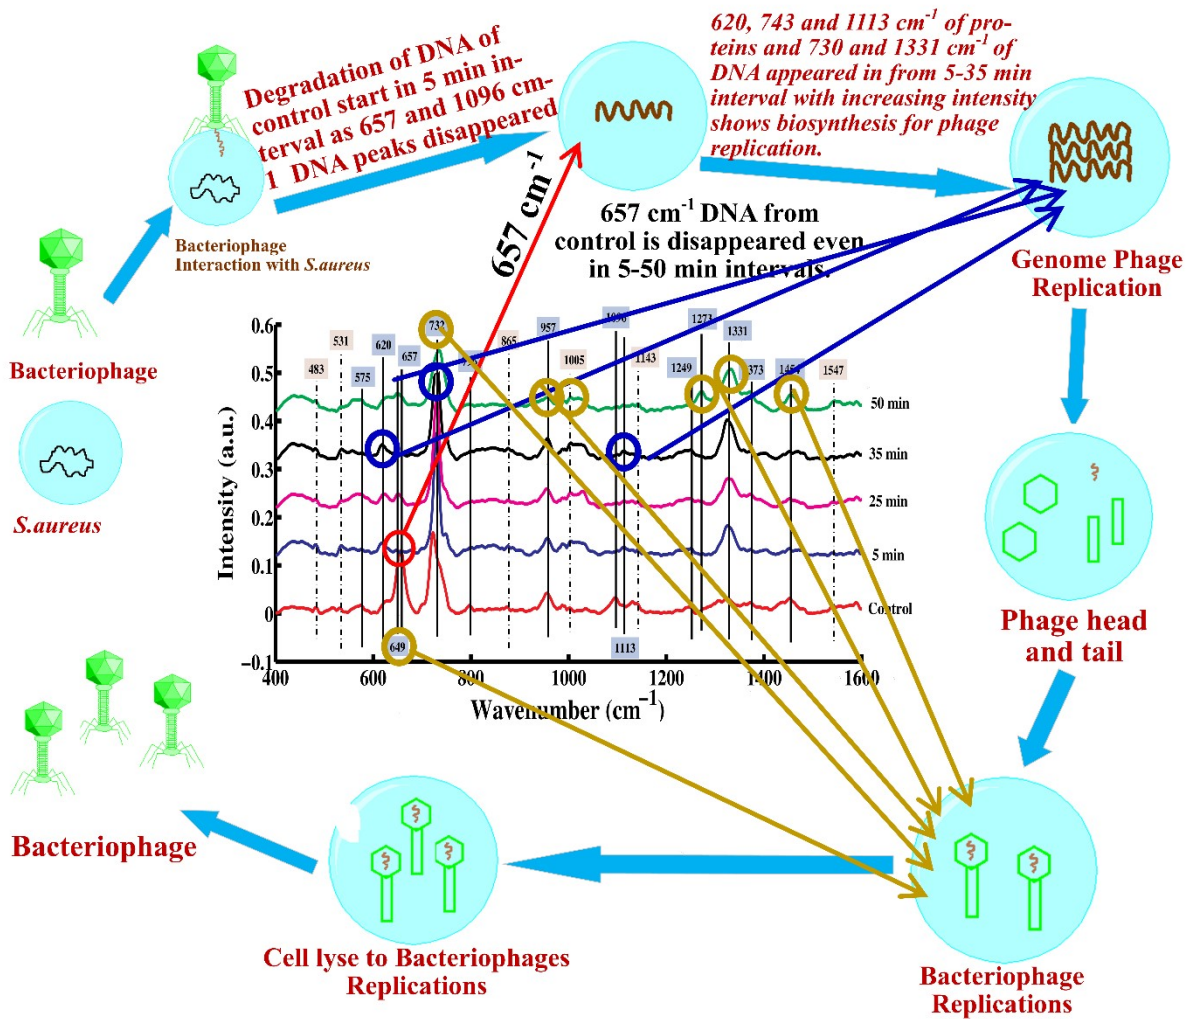

**Fig. S8:** Proposed schematic diagram of SERS characterization of bacteriophage infected *S. aureus* bacteria.
